# Supplementary material for: Exposure to the Chinese famine of 1959–61 in early life and long-term health conditions: a systematic review and meta-analysis
Source: Oxford University Press journal article supplement (doi:10.1093/ije/dyx013), 2017-01-30
Supplement: dyx013_Supplementary_Figure_1.docx [file dyx013_Supplementary_Figure_1.docx]

**Supplementary Figure 1: Provincial mortality level across China 1956-64**

**
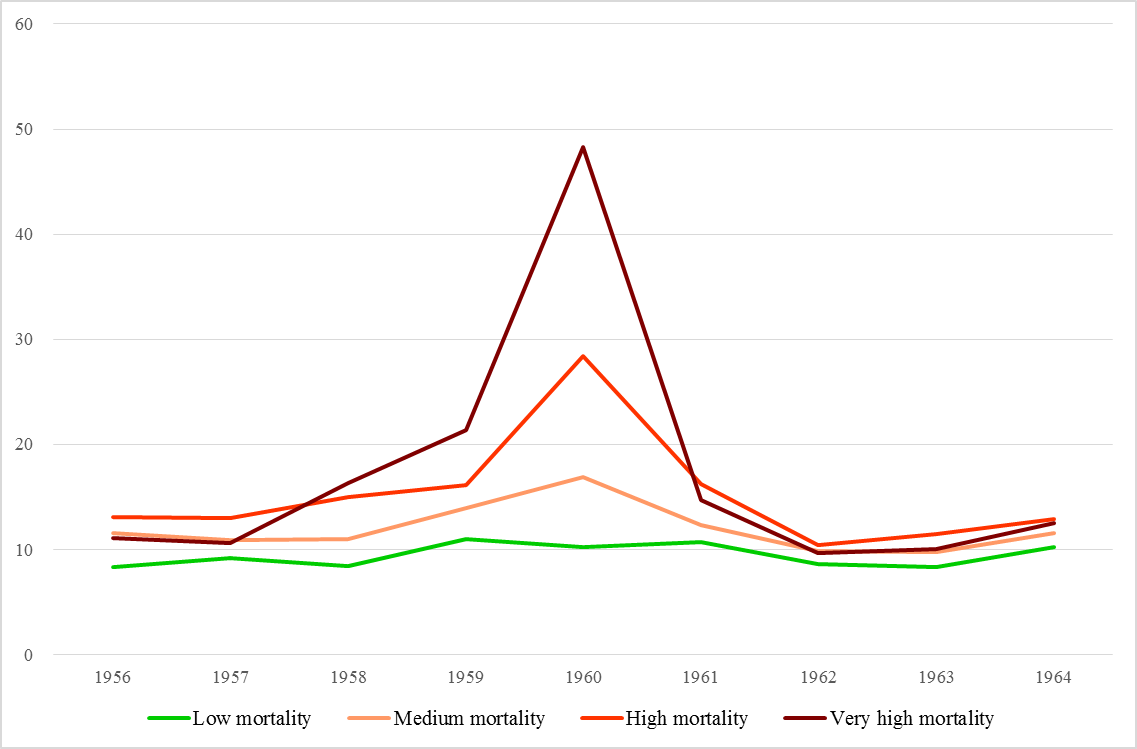
**

All-cause mortality rate per thousand population across different provinces of China in 1956-64. The very high mortality group includes Anhui, Sichuan, Guizhou, Gansu, Qinghai, and Henan; the high mortality group includes Guangxi, Hunan, and Yunnan; the medium group includes Shandong, Huibei, Jiangsu, Jiangxi, Hebei, Xinjiang, Fujian, Guangdong, Shansi, and Ningxia; the low group includes Shanxi, Zhejiang, Liaoning, Heilongjiang, Tianjin, Jilin, Neimong, Beijing, and Shanghai. Data from Lin and Yang (2000)9
