# Supplementary material for: Exposure to the Chinese famine of 1959–61 in early life and long-term health conditions: a systematic review and meta-analysis
Source: Oxford University Press journal article supplement (doi:10.1093/ije/dyx013), 2017-01-30
Supplement: dyx013_Supplementary_Figure_2.docx [file dyx013_Supplementary_Figure_2.docx]

**Supplementary Figure 2: Number of provinces by survey type and provincial mortality level in studied provinces**


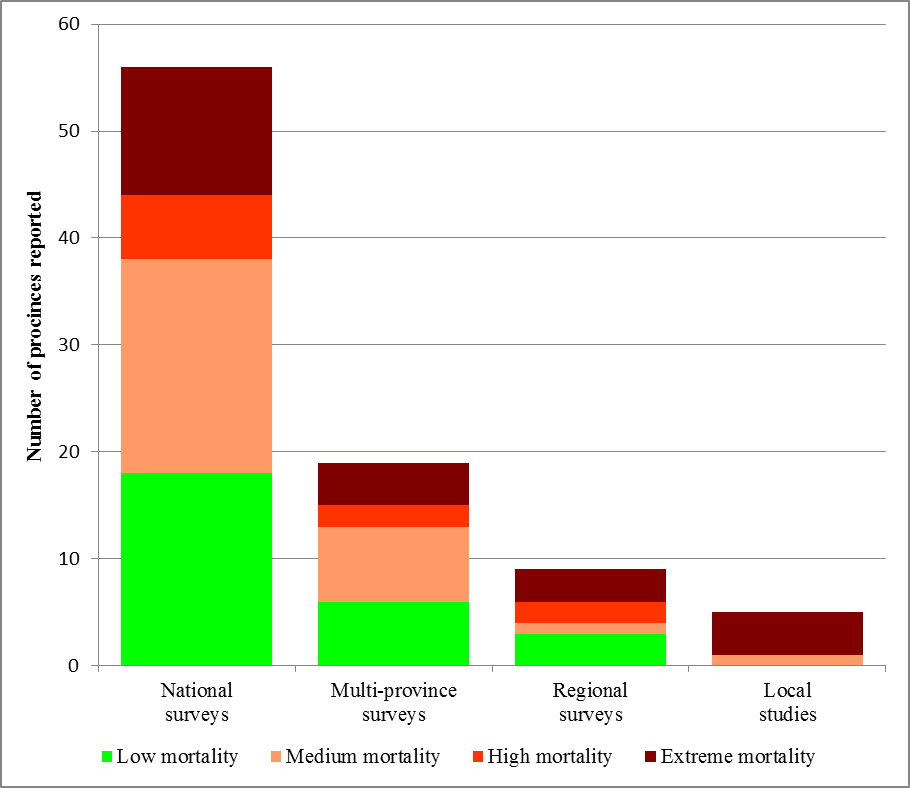


By addition of province counts in surveys and studies
