# Supplementary material for: Exposure to the Chinese famine of 1959–61 in early life and long-term health conditions: a systematic review and meta-analysis
Source: Oxford University Press journal article supplement (doi:10.1093/ije/dyx013), 2017-01-30
Supplement: dyx013_Supplementary_Figure_4.docx [file dyx013_Supplementary_Figure_4.docx]

**Supplementary Figure 4: Effect estimates on different health conditions comparing famine births with pre-famine births**

M-H Subtotal: Mantel-Haenszel fixed-effects model summary estimates

D+L Subtotal: DerSimonian-Laird random-effects model summary estimates

Boxes and horizontal lines represent odds ratios and 95% CI for each outcome

The size of each box is proportional to weight of that trial result. Diamonds represent the 95% CI for pooled estimates of effect and are centered on pooled odds ratio using a fixed-effects model and a random-effects model
