# Supplementary material for: Exposure to the Chinese famine of 1959–61 in early life and long-term health conditions: a systematic review and meta-analysis
Source: Oxford University Press journal article supplement (doi:10.1093/ije/dyx013), 2017-01-30
Supplement: dyx013_Supplementary_Text_2.doc [file dyx013_Supplementary_Text_2.doc]

**Supplementary Text 2: Study protocol**

**Topic: Long-term health after prenatal or early childhood exposure to the 1959-1961 Great Leap Forward Famine in China: a systematic review and meta-analysis**

**BACKGROUND**

By current government estimates, China has more than 260 million patients with chronic diseases[1](#_ENREF_1). Cardiovascular diseases (CVD), cancers, chronic respiratory diseases, and diabetes account for over 70% of the nation’s deaths and 50% of total medical costs.[1-9](#_ENREF_1) In 2008, Yang et al. concluded that the aging population structure and the increasing high-risk behaviors, including unhealthy diet, sedentary lifestyle, and smoking, are the two major forces driving the increase of chronic disease in China.[10](#_ENREF_10)

The aging population in China shows the fastest increase worldwide.[11-13](#_ENREF_11) The proportion of population above 60 years old had grown from 10.5% to 13.3% between 2000 and 2010. It is expected that the proportion will exceed 30% (over 400 million) before 2050. The rise in chronic diseases is also closely related to common and largely modifiable risk behaviors that have steadily increased along with improving living standards among the Chinese people over the past three decades. In response to these changes, China has implemented several specific health interventions and has started a series of programs to prevent chronic diseases and improve population health.[1](#_ENREF_1) Nevertheless, the burden of chronic diseases is likely to further increase in the near future.

Other emerging economics such as India and Brazil face similar health dilemmas as China in relation to the future burden of chronic disease.[20](#_ENREF_20) There may be additional risk factors however affecting the health of the Chinese population given its specific history. In late 1950s and early 1960s, China experienced the largest famine in human memory, the Chinese Great Leap Forward Famine of 1959-1961 (thereafter Chinese famine), with an estimated excess deaths of 15-43 million.[21-26](#_ENREF_21) While the famine’s cause, demographic impact, and political influence have been widely discussed, its potential effects on long-term health and economic outcomes among Chinese population need more extensive and systematic evaluation for several reasons.

First, several national and regional health surveys in China show adverse health outcomes among men and women born in the famine years,[32-35](#_ENREF_32) but these reported long-term effects of Chinese famine have not been widely acknowledged partially due to the limitations in their study designs and analytical methods. Reliable effect estimates may contribute to formulation of specific policies, as China is undergoing health care reform to improve both health care coverage and quality. Second, the mechanisms of how the Chinese famine may contribute to the obesity and other chronic diseases epidemic have not been fully explored. Besides imposing possible lasting biological effects on chronic disease development, the Chinese famine may also have profoundly changed cultural beliefs and health behaviors. As Wu et al. suggested, the Chinese people’s memory of famine reinforced prevailing social attitudes that excess body fat represents health and prosperity,[36](#_ENREF_36) which is especially true in remote and famine severe areas. Third, very few of these reports effectively assessed how famine and established risk factors may interact to influence the current health of people with famine experience. The interaction between these risk factors may make people with famine experience at extremely high risk of chronic diseases.

We expect there could be a substantial long-term impact of the famine on the burden of chronic diseases in China, since most Chinese over age 50 today have been exposed to the famine at some point of their early life and findings from reports of other famines around the world indicated the relationship between early-life undernutrition and adverse adulthood health outcomes. Considering the increasing interest on this topic in past decade and lack of critical review on these findings, we thus summarize existing Chinese famine reports relevant to long-term health outcomes and evaluate how they may help address these questions. Based on our findings, we suggest that researchers should further explore the potential of existing data to address these questions, like the China Health and Retirement Longitudinal Study (CHARLS) and other comparable ones. Besides identifying appropriate study population, researchers should pay special attention to definition of famine exposure. And finally, we think it is possible to establish new cohorts in regions severely affected by famine through household registration system.

**METHODS**

**Search strategy**

We will follow the Preferred Reporting Items for Systematic Reviews and Meta-Analyses guidelines in this systematic review. We will search the PubMed, Embase, Chinese Wanfang Data, and Chinese National Knowledge Infrastructure (CNKI) databases for published reports. Broad search terms in English and Chinese were designed to capture all health reports related to the Chinese famine. Terms will be searched include: “China” and “famine”, “China” and “undernutrition”, "Chinese famine”, “Great Leap Forward”, “Great famine”, and the MESH terms “starvation”, “malnutrition” combined with “China” or “Chinese”. Additionally, we will screen review articles and reference lists for relevant reports, and examine journal articles, degree theses, and conference reports. The search starts on December 2014 and will be conducted every six months until December 2015.

**Inclusion criteria**

Reports meeting the following criteria will be included: (1) the Chinese famine was defined as an exposure or risk factor; (2) chronic diseases or conditions were the major outcome of interest; (3) outcomes had been assessed with comparable methods for subjects with and without exposure; (4) a description of the study population, study design, and analysis was available.

**Data extraction**

Both authors will independently review the titles and abstracts to identify potentially relevant reports. If needed, both authors will review the full texts to determine if reports met the inclusion criteria. Discrepancies will be resolved through discussion. For the selected reports, the authors will extract study characteristics (study title, authors’ names, year of publication or report, journal’s name or report type, publication language), study population characteristics (birth year or age, birthplace or residential information, study size, baseline health characteristics, and outcomes studied), study exposures (how the famine-related experience was defined), analytical strategies (statistical models and included covariates), study outcomes (how the outcomes of interest were measured), as well as the reported study results and associations with famine exposure. All data extracted will be stored in Microsoft Excel and also STATA database.

**Quality assessment**

We will modify the Newcastle–Ottawa Scale (NOS) and apply it to assess study characteristics that are eligible for our systematic review.

**Data synthesis and analysis**

We will first use a narrative approach to synthesize reported results. Based on sample characteristics, we plan to categorize the included reports in four groups: 1) national surveys, 2) multi-province surveys covering at least two provinces, 3) regional surveys covering only one province or specific regions within a province, and 4) local studies covering only specific sites. We will classify provincial mortality levels across China 1956-64 into four groups, including provinces with ‘low mortality’ (all-cause mortality rate less than 15/1,000 during the most severe famine year), ‘medium mortality’ (15/1,000 to 20/1,000), ‘high mortality’ (20/1,000 to 40/1,000), ‘extreme mortality’ (over 40/1,000). For each study, we will calculate the monthly number of exposed subjects as an indicator of effective study size.

We will explore the potential for meta-analysis to obtain summary estimates of the long-term impact of early-life famine. Among reports eligible for meta-analysis, we will compare number of cases, number of births, and estimated mortality by region and birth year to investigate heterogeneity and estimate famine effect on schizophrenia by calculating Mantel-Haenszel odds ratio (OR) with Stata version 11.

**References**
